# Supplementary material for: A method to determine the displacement velocity field in the apical region of the Arabidopsis root
Source: PubMed Central journal article supplement (PMC3481058; doi:10.1007/s00425-012-1707-x), 2012-07-25
Supplement: 425_2012_1707_MOESM1_ESM.pdf [file 425_2012_1707_MOESM1_ESM.pdf]

A method to determine the displacement velocity field in the apical region of the Arabidopsis root  
 Jerzy Nakielski, Marcin Lipowczan

**Online Resource S1: The curvilinear orthogonal coordinate system,  $RC(u, v, \varphi)$ , used to describe the root apex**

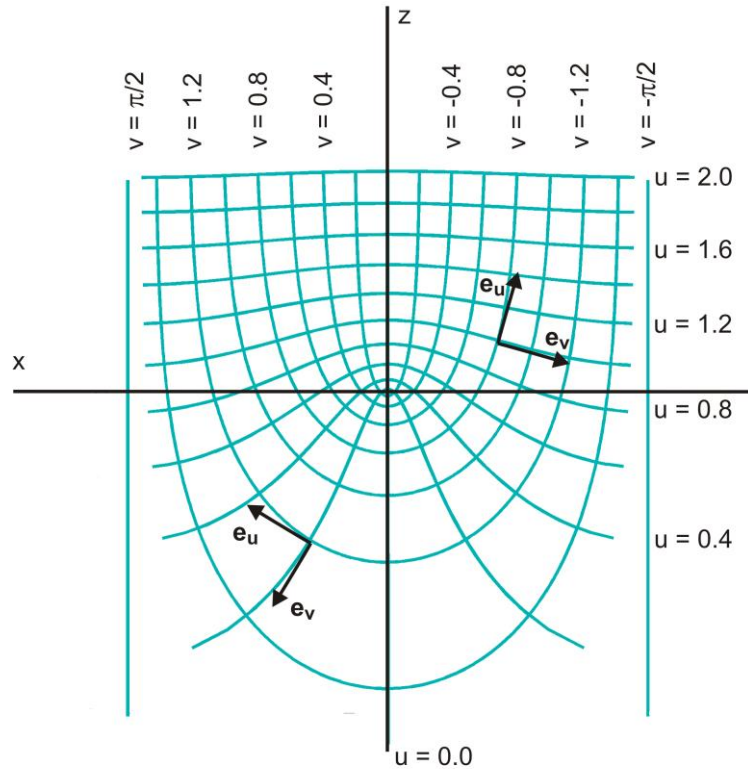

The system is represented by traces of the coordinate surfaces on the  $xz$  plane;  
 $e_u$  and  $e_v$  are two unit vectors, the third one  $e_\varphi$  (not shown) is perpendicular to this plane.

Coordinate equations:

$$x = \frac{2}{\pi} \arctan(\tanh u \tan v) \cos \varphi$$

$$y = \frac{2}{\pi} \arctan(\tanh u \tan v) \sin \varphi$$

$$z = \frac{1}{\pi} \log(\cosh^2 u - \sin^2 v)$$

Scale factors:

$$h_u = h_v = \frac{\sqrt{\sinh^2(2u) + \sin^2(2v)}}{\cosh^2 u - \sin^2 v}, \quad h_\varphi = 2 \arctan(\tanh u \tan v)$$
