# Supplementary material for: A method to determine the displacement velocity field in the apical region of the Arabidopsis root
Source: PubMed Central journal article supplement (PMC3481058; doi:10.1007/s00425-012-1707-x), 2012-07-25
Supplement: 425_2012_1707_MOESM2_ESM.pdf [file 425_2012_1707_MOESM2_ESM.pdf]

**Online Resource S2: Velocity field for the profile changed in part below QC**

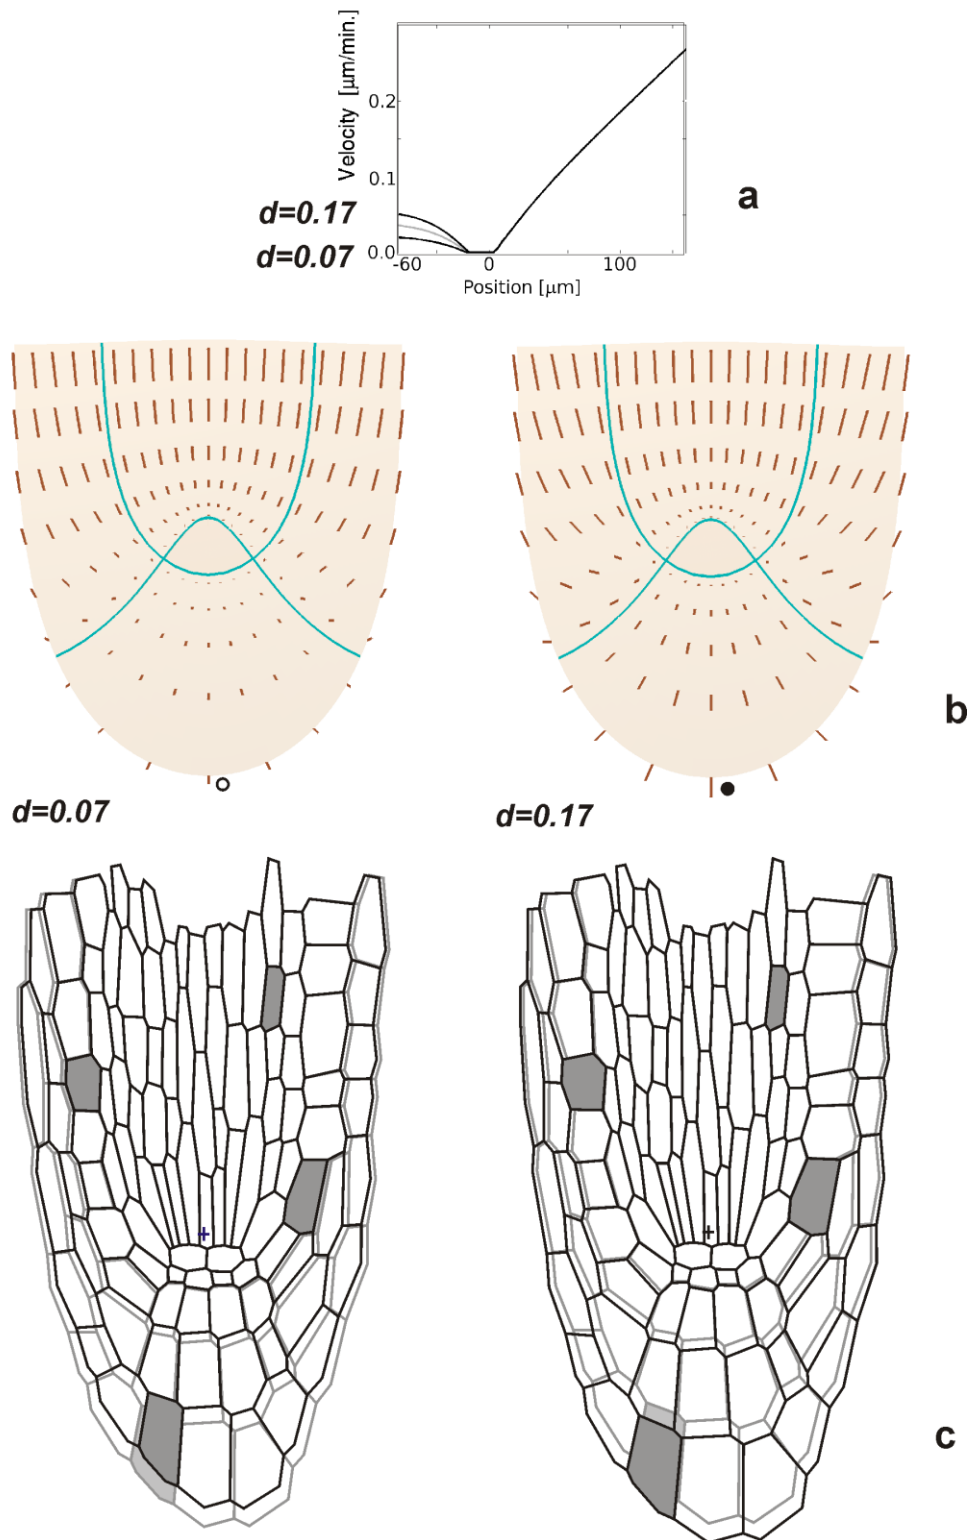

**a** Two velocity profiles for the root axis below QC defined by different values of the parameter  $d$ , in both the velocity above this zone is specified  $c=0,8$ ; **b** V fields obtained for these profiles, values of the marked vectors in units of Fig.5a are:  $0.018 \mu\text{m min}^{-1}$  (open circle) and  $0.054 \mu\text{m min}^{-1}$  (closed circle); **c** the simulated cell expansion resulting from application of both fields, the results are comparable to final time-step of the sequence in Fig.6 redrawn in the background (grey).
